# Supplementary material
Source: publisher figshare collection journal article supplement (https://acs.figshare.com/ndownloader/files/28277822)
Supplement: Supplementary file 1 [file 28277822]

## **Supporting Information**

### **Dual-Channel Logic Gates Operating on the Chemopalette ssDNA-Ag NCs/GO Nanocomposites**

Da-Qian Feng and Guoliang Liu\*

School of Chemistry and Chemical Engineering, Yancheng Institute of Technology,  
Yancheng 224051, China.

\*To whom correspondence should be addressed. Fax/Tel: +86-515-88298190. E-mail:  
liuguoliang199@126.com; glliu@ycit.edu.cn.

## Contents

|                            |     |
|----------------------------|-----|
| 1. <b>Figure S1</b> .....  | S3  |
| 2. <b>Figure S2</b> .....  | S4  |
| 3. <b>Figure S3</b> .....  | S5  |
| 4. <b>Figure S4</b> .....  | S6  |
| 5. <b>Figure S5</b> .....  | S7  |
| 6. <b>Table S1</b> .....   | S8  |
| 7. <b>Table S2</b> .....   | S9  |
| 8. <b>Table S3</b> .....   | S10 |
| 9. <b>Figure S6</b> .....  | S11 |
| 10. <b>Figure S7</b> ..... | S12 |
| 11. <b>Table S4</b> .....  | S13 |

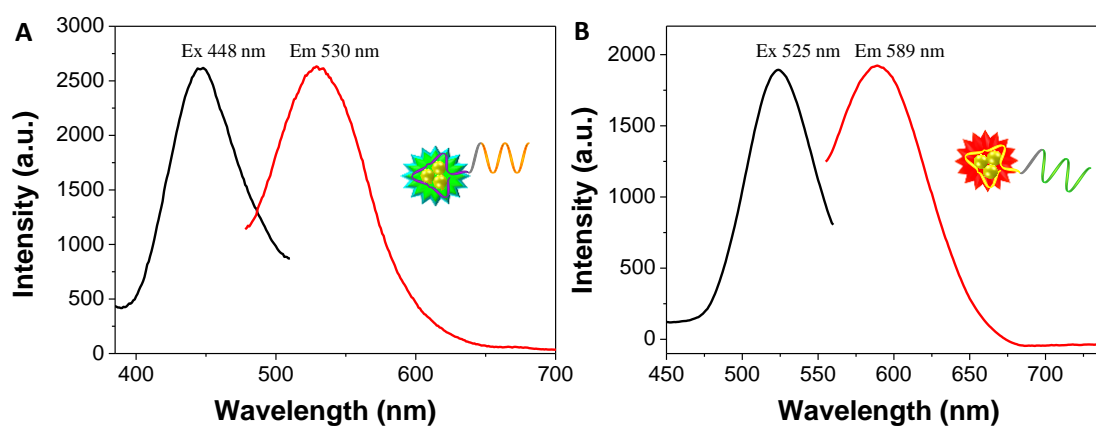

**Figure S1.** (A) The fluorescent excitation (black line) and emission (red line) spectra of synthesized G-Ag NCs-CH5N1 stabilized by the nucleic acid sequence **1**. (B) The fluorescent excitation (black line) and emission (red line) spectra of synthesized R-Ag NCs-CH1N1 stabilized by the nucleic acid sequence **2**.

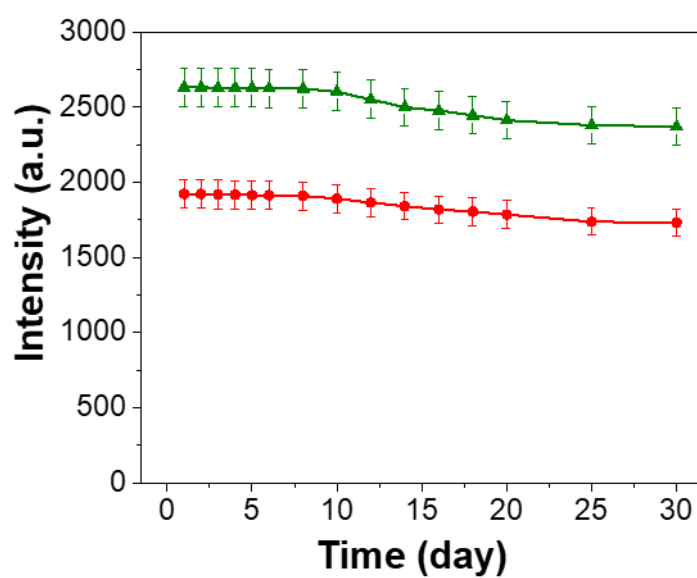

**Figure S2.** The investigation on the stability of fluorescent silver nanoclusters G-Ag NCs-CH5N1(green curve) at 530 nm and R-Ag NCs-CH1N1(red curve) at 589 nm. The fluorescence spectra were measured for three parallel tests when the solutions had been stored at 4 °C for corresponding time.

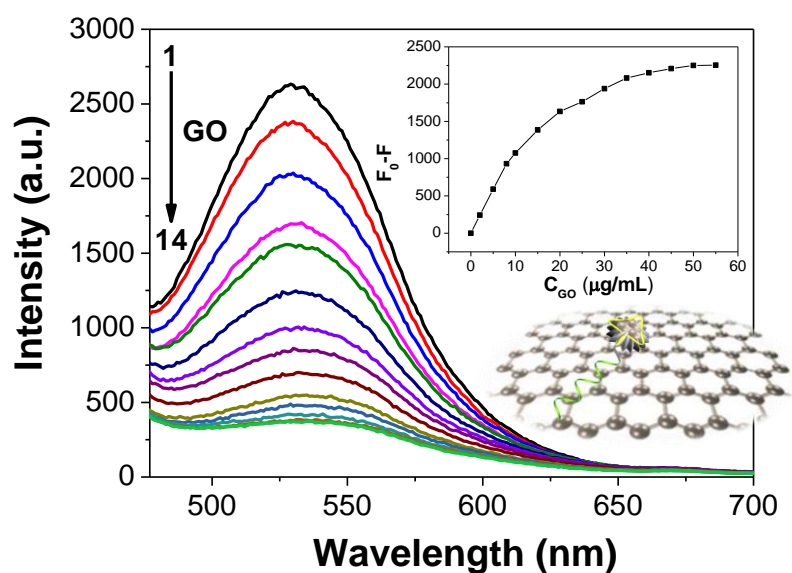

**Figure S3.** Effects of GO concentration on the fluorescence responses of the G-Ag NCs-CH5N1/GO nanocomposites. The fluorescence spectra of G-Ag NCs-CH5N1 in the presence of different amounts of GO from 0 to 55  $\mu\text{g/mL}$ . Conditions: 1, G-Ag NCs-CH5N1; 2–14: 1 + GO ( $\mu\text{g/mL}$ ): 2, 5, 8, 10, 15, 20, 25, 30, 35, 40, 45, 50, and 55. The inserted figure is the curve of fluorescence intensity change ( $F_0 - F$ ) of the G-Ag NCs-CH5N1/GO solution at 530 nm versus the concentration of GO from 0 to 55  $\mu\text{g/mL}$ .

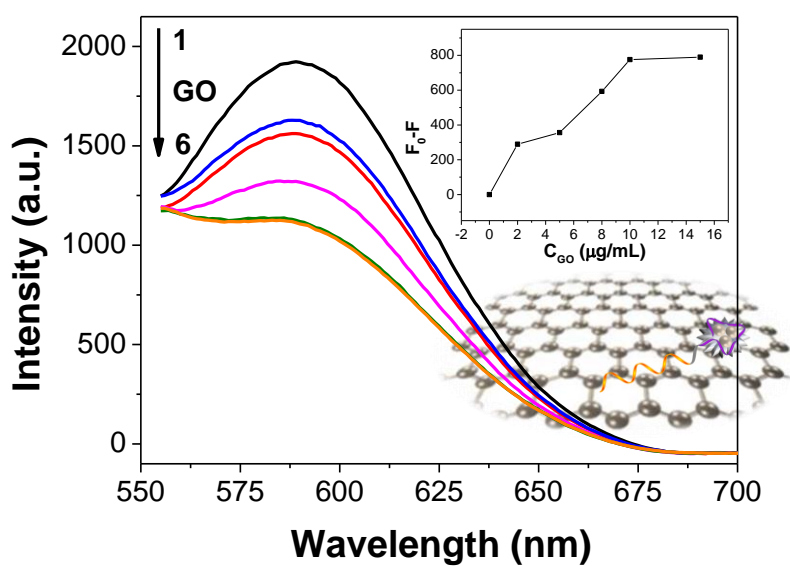

**Figure S4.** Effects of GO concentration on the fluorescence responses of the R-Ag NCs-CH1N1/GO nanocomposites. The fluorescence spectra of R-Ag NCs-CH1N1 in the presence of different amounts of GO from 0 to 15  $\mu\text{g/mL}$ . Conditions: 1, R-Ag NCs-CH1N1; 2–6: 1 + GO ( $\mu\text{g/mL}$ ): 2, 5, 8, 10, and 15. The inserted figure is the curve of fluorescence intensity change ( $F_0 - F$ ) of the R-Ag NCs-CH1N1/GO solution at 586 nm versus the concentration of GO from 0 to 15  $\mu\text{g/mL}$ .

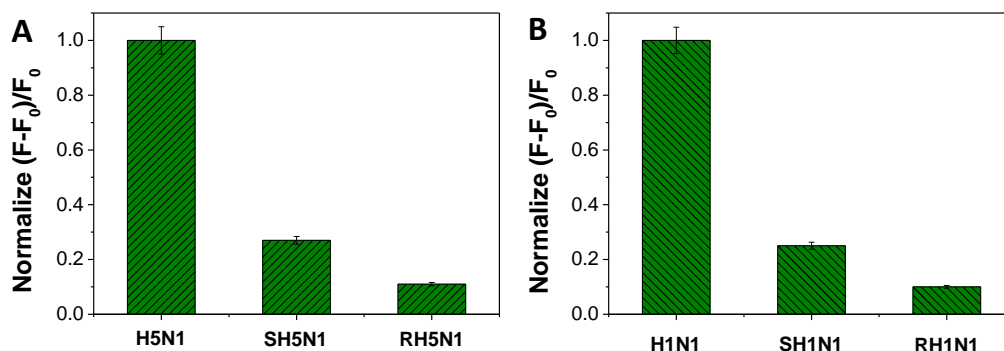

**Figure S5.** (A) The histogram of the fluorescence enhancement  $(F-F_0)/F_0$  of the G-Ag NCs-CH5N1/GO nanocomposites in the presence of target DNA (H5N1, sequence **3**), single-base mismatch DNA (SH5N1, sequence **7**), and random DNA (RH5N1, sequence **8**). (B) The histogram of the fluorescence enhancement  $(F-F_0)/F_0$  of the R-Ag NCs-CH1N1/GO nanocomposites in the presence of target DNA (H1N1, sequence **4**), single-base mismatch DNA (SH1N1, sequence **9**), and random DNA (RH1N1, sequence **10**).  $F_0$  and  $F$  correspond to the fluorescence intensity of the G-Ag NCs-CH5N1/GO or R-Ag NCs-CH1N1/GO nanocomposites system in the absence and presence of target DNAs, respectively. Error bars were obtained from three parallel experiments.

**Table S1.** Compared fluorescent recovery rate calculated in this study with the reported other assays.

| Probes         | Sequences (5'-3')                                                      | Em<br>(nm) | Fluorescent<br>recovery rate | References |
|----------------|------------------------------------------------------------------------|------------|------------------------------|------------|
| 9 ASNCB        | <b>CCCTTTAAGCCCTTCTTCATCGAGAGTGTAGTCGGA</b><br>AGAA-BHQ1               | 520        | 209%                         | 15         |
| 15 ASNCB       | <b>CCCTTTAAGCCCTAGGTTGGTGTGGTTGGTGTGGTT</b><br><b>GGACACCAACC-BHQ1</b> | 546        | 51.1%                        | 15         |
| R-Ag NCs-CH1N1 | <b>CCTCCTTCCTCC</b> <b><u>TTCTTCATCGAGAGTGTAGTCG</u></b>               | 589        | 200%                         | This study |



**Table S2.** The truth table of the INHIBIT logic gate for H5N1 gene detection based on G-Ag NCs-CH5N1/GO nanocomposites.

| Input 1<br>(H5N1) | Input 2<br>(CH5N1) | Output |
|-------------------|--------------------|--------|
| 0                 | 0                  | 0      |
| 1                 | 0                  | 1      |
| 0                 | 1                  | 0      |
| 1                 | 1                  | 0      |

**Table S3.** The truth table of the INHIBIT logic gate for H1N1 gene detection based on R-Ag NCs-CH1N1/GO nanocomposites.

| Input 1<br>(H1N1) | Input 2<br>(CH1N1) | Output |
|-------------------|--------------------|--------|
| 0                 | 0                  | 0      |
| 1                 | 0                  | 1      |
| 0                 | 1                  | 0      |
| 1                 | 1                  | 0      |

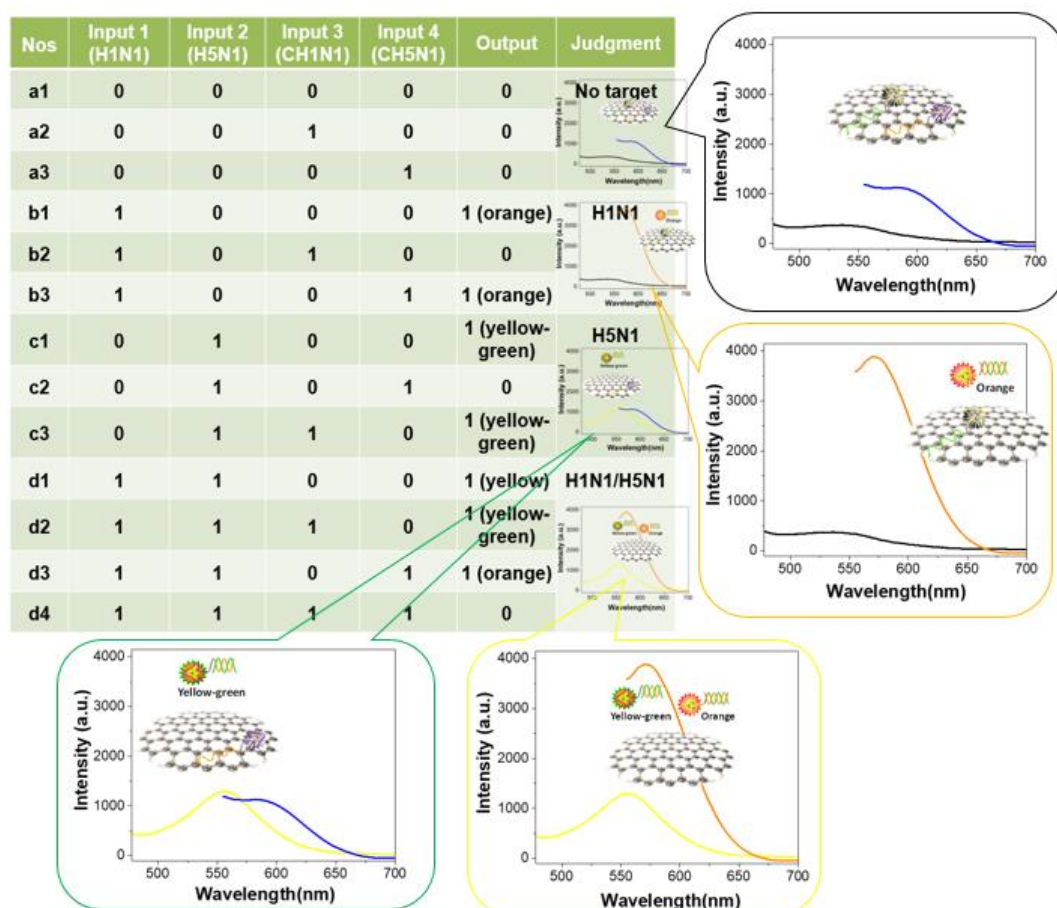

**Figure S6.** Truth table of combinatorial logic gates for the multiplexed detection of H1N1 and H5N1 based on ssDNA-Ag NCs conjugating the complementary sequence of target virus subtype genes/GO nanocomposites.

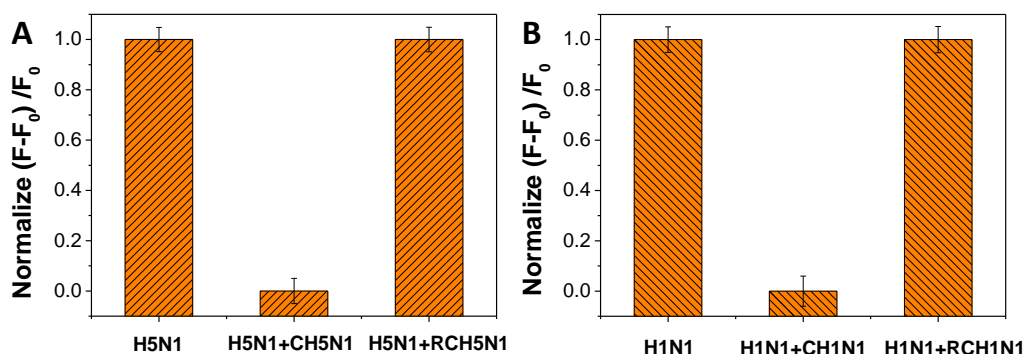

**Figure S7.** (A) The histogram of the fluorescence enhancement  $(F-F_0)/F_0$  of the G-Ag NCs-CH5N1/GO nanocomposites in the presence of target DNA (H5N1, sequence **3**), H5N1 + the complement sequence of target virus gene (CH5N1, sequence **5**), and H5N1 + the random sequence of the complement sequence of target virus gene (RCH5N1, sequence **11**). (B) The histogram of the fluorescence enhancement  $(F-F_0)/F_0$  of the R-Ag NCs-CH1N1/GO nanocomposites in the presence of target DNA (H1N1, sequence **4**), H1N1 + the complement sequence of target virus gene (CH1N1, sequence **6**), and H1N1 + the random sequence of the complement sequence of target virus gene (RCH1N1, sequence **12**).  $F_0$  and  $F$  correspond to the fluorescence intensity of the G-Ag NCs-CH5N1/GO or R-Ag NCs-CH1N1/GO nanocomposites system in the absence and presence of target DNAs, respectively. Error bars were obtained from three parallel experiments.

**Table S4.** Summary of the reported fluorescence DNA sensing methods.

| Method                                | Detection<br>limit (nM) | Detection time<br>interval (h) | References    |
|---------------------------------------|-------------------------|--------------------------------|---------------|
| Activatable SNCB                      | 2                       | 0.5                            | 16            |
| GO/molecular beacons                  | 2                       | 2                              | 30            |
| GO/nucleic-acid-stabilized<br>Ag NCs  | 0.5                     | 1-1.5                          | 31            |
| DNA-templated Ag NCs                  | 25                      | 24                             | 38            |
| Polymerization/nicking<br>DNA machine | 1-10                    | 4-10                           | 39            |
| Releasing acridine orange<br>from GO  | 50                      | -                              | 40            |
| Cobalt oxyhydroxide<br>nanoflake      | 0.5                     | 0.25                           | 41            |
| Chemopalette ssDNA-Ag<br>NCs/GO       | 0.1 or 1                | 0.33                           | Present study |
